# Supplementary material for: Autocrine activin A signalling in ovarian cancer cells regulates secretion of interleukin 6, autophagy, and cachexia
Source: PubMed Central journal article supplement (PMC7015233; doi:10.1002/jcsm.12489), 2019-08-21

Figure S3

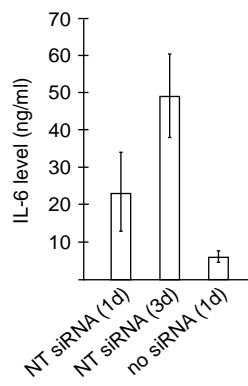

Supplement: JCSM-11-195-s003.pdf [file JCSM-11-195-s003.pdf]
